# Supplementary material for: Isolation, identification and characterization of nitrogen fixing endophytic bacteria and their effects on cassava production
Source: PeerJ journal article supplement (doi:10.7717/peerj.12677), 2022-01-25
Supplement: Fig_1_raw_data.pdf [file Fig_1_raw_data.pdf]

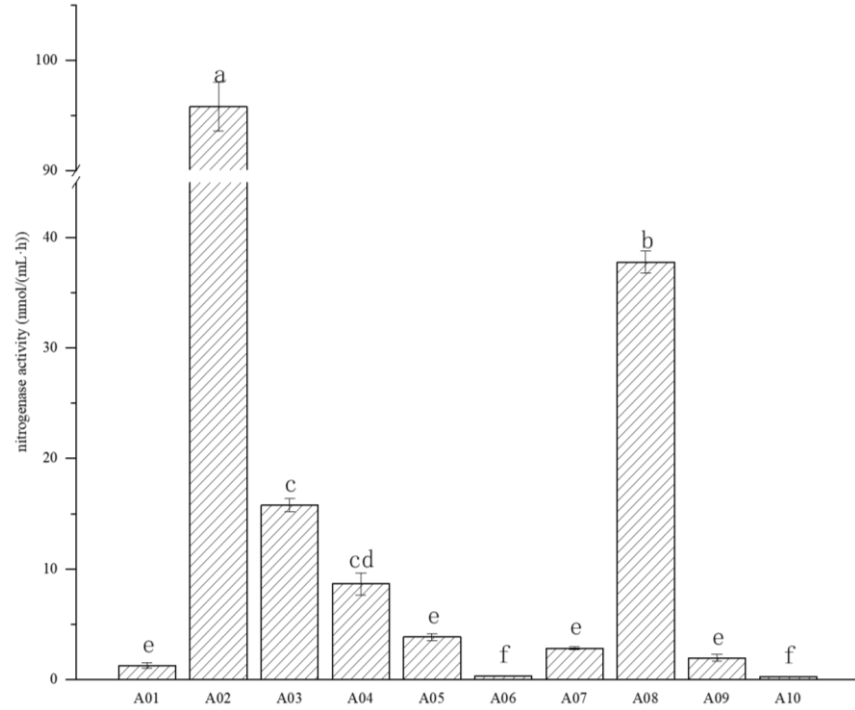

Figure 1 Nitrogenase activity in nitrogen-free liquid medium.

|     | Nitrogenase activity (nmol/(mL.h)) |        |         |        |         |      |
|-----|------------------------------------|--------|---------|--------|---------|------|
|     | 1                                  | 2      | 3       | 4      | Average | S.E. |
| A01 | 1.795                              | 0.584  | 1.415   | 1.181  | 1.24    | 0.25 |
| A02 | 91.929                             | 92.008 | 100.381 | 98.913 | 95.81   | 2.24 |
| A03 | 17.423                             | 14.763 | 15.144  | 15.658 | 15.75   | 0.59 |
| A04 | 7.039                              | 8.157  | 7.840   | 11.507 | 8.64    | 0.99 |
| A05 | 3.641                              | 4.532  | 3.014   | 4.152  | 3.83    | 0.33 |
| A06 | 0.234                              | 0.382  | 0.301   | 0.244  | 0.29    | 0.03 |
| A07 | 2.885                              | 2.730  | 3.074   | 2.581  | 2.82    | 0.11 |
| A08 | 40.580                             | 37.020 | 35.863  | 37.632 | 37.77   | 1.00 |
| A09 | 2.328                              | 1.872  | 2.518   | 1.026  | 1.94    | 0.33 |
| A10 | 0.269                              | 0.267  | 0.235   | 0.185  | 0.24    | 0.02 |

\* Each treatment with four replications, n=4.
