# Supplementary material for: Isolation, identification and characterization of nitrogen fixing endophytic bacteria and their effects on cassava production
Source: PeerJ journal article supplement (doi:10.7717/peerj.12677), 2022-01-25
Supplement: Figure_2_Raw_data.pdf [file Figure_2_Raw_data.pdf]

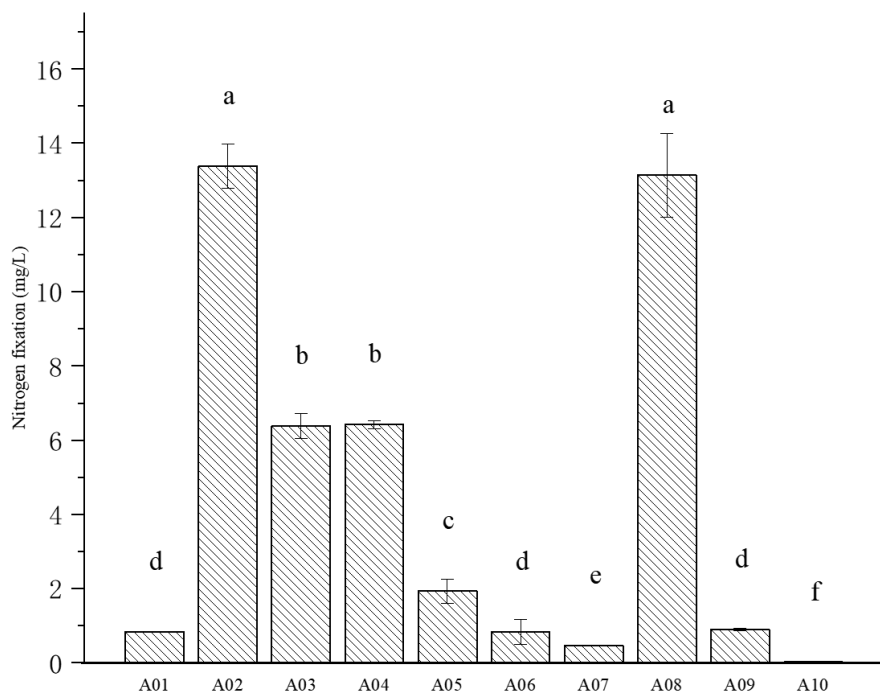

Figure 2 Nitrogen fixation in nitrogen-free liquid medium

|     | Nitrogen fixation (mg/L) |       |       |       |         |       |
|-----|--------------------------|-------|-------|-------|---------|-------|
|     | 1                        | 2     | 3     | 4     | average | S.E.  |
| A01 | 0.801                    | 0.851 | 0.804 | 0.886 | 0.835   | 0.020 |
| A02 | 14.88                    | 12.86 | 13.68 | 12.13 | 13.38   | 0.591 |
| A03 | 6.565                    | 6.379 | 5.488 | 7.089 | 6.380   | 0.333 |
| A04 | 6.965                    | 6.315 | 6.213 | 6.181 | 6.419   | 0.184 |
| A05 | 1.534                    | 2.035 | 2.787 | 1.363 | 1.930   | 0.319 |
| A06 | 1.045                    | 1.702 | 0.301 | 0.318 | 0.842   | 0.335 |
| A07 | 0.455                    | 0.419 | 0.586 | 0.428 | 0.472   | 0.039 |
| A08 | 15.79                    | 12.90 | 10.29 | 13.60 | 13.14   | 1.134 |
| A09 | 0.881                    | 0.985 | 0.855 | 0.826 | 0.887   | 0.035 |
| A10 | 0.046                    | 0.012 | 0.010 | 0.029 | 0.024   | 0.008 |

\* Each treatment with four replications, n=4.
