# Supplementary material for: Isolation, identification and characterization of nitrogen fixing endophytic bacteria and their effects on cassava production
Source: PeerJ journal article supplement (doi:10.7717/peerj.12677), 2022-01-25
Supplement: Figure_5_Raw_data.pdf [file Figure_5_Raw_data.pdf]

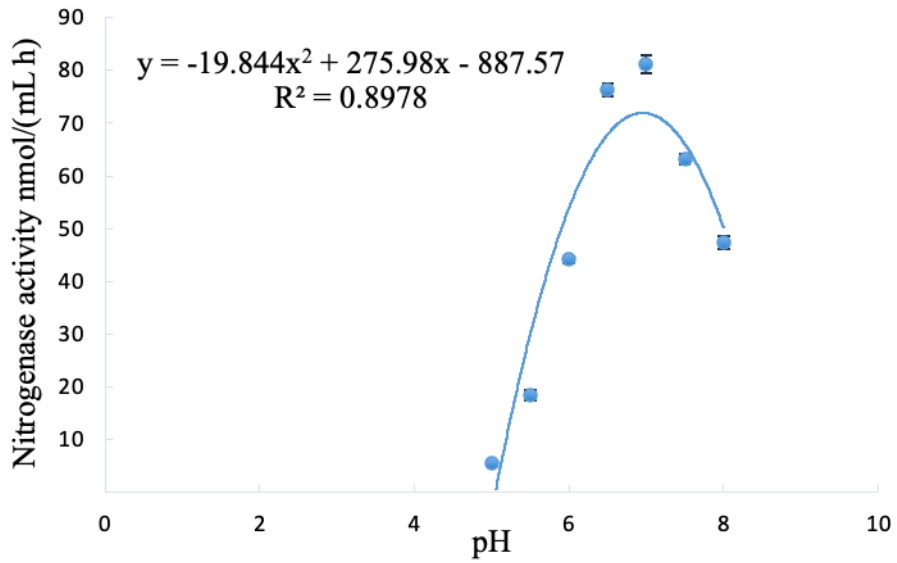

Figure 5 Influence of pH on the nitrogenase activity of strain A02

| pH  | Nitrogenase activity (nmol/(mL.h)) |       |       |       |
|-----|------------------------------------|-------|-------|-------|
|     | 1                                  | 2     | 3     | 4     |
| 5   | 5.74                               | 5.76  | 5.64  | 5.11  |
| 5   | 15.22                              | 20.94 | 18.36 | 18.94 |
| 6   | 42.44                              | 45.92 | 43.95 | 43.93 |
| 6.5 | 77.98                              | 78.95 | 71.87 | 76.24 |
| 7   | 79.36                              | 89.91 | 81.73 | 73.94 |
| 7.5 | 60.41                              | 65.98 | 63.17 | 63.12 |
| 8   | 50.05                              | 46.12 | 52.11 | 40.91 |

\* Each treatment with four replications, n=4.
