# Supplementary material for: Isolation, identification and characterization of nitrogen fixing endophytic bacteria and their effects on cassava production
Source: PeerJ journal article supplement (doi:10.7717/peerj.12677), 2022-01-25
Supplement: Figure_6_Raw_data.pdf [file Figure_6_Raw_data.pdf]

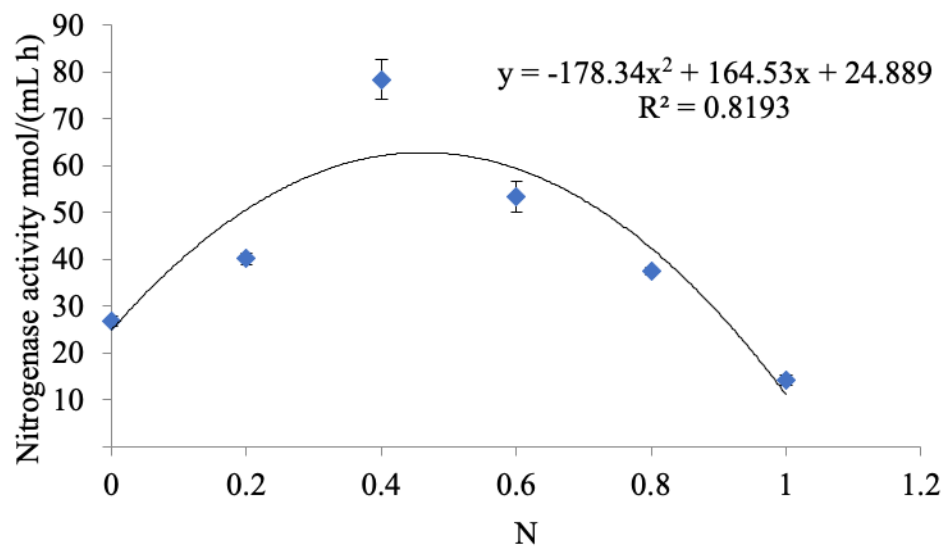

Figure 6 Influence of N on the nitrogenase activity of the A02 strain

| N<br>(g L <sup>-1</sup> ) | Nitrogenase activity (nmol/ (mL h)) |       |       |       |         |
|---------------------------|-------------------------------------|-------|-------|-------|---------|
|                           | 1                                   | 2     | 3     | 4     | Average |
| 0                         | 26.53                               | 34.00 | 30.26 | 27.37 | 29.54   |
| 0.2                       | 46.98                               | 39.98 | 37.49 | 36.23 | 40.17   |
| 0.4                       | 60.93                               | 66.99 | 91.94 | 93.89 | 78.44   |
| 0.6                       | 60.84                               | 67.38 | 39.28 | 45.93 | 53.36   |
| 0.8                       | 41.34                               | 33.95 | 38.49 | 36.40 | 37.54   |
| 1.0                       | 11.94                               | 19.39 | 9.99  | 15.39 | 14.18   |

\* Each treatment with four replications, n=4.
