# Supplementary material for: Isolation, identification and characterization of nitrogen fixing endophytic bacteria and their effects on cassava production
Source: PeerJ journal article supplement (doi:10.7717/peerj.12677), 2022-01-25
Supplement: Figure_7_Raw_data.pdf [file Figure_7_Raw_data.pdf]

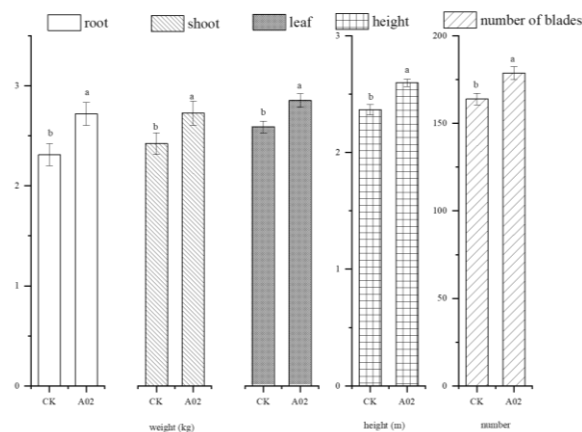

Figure 7 Effect of strain A02 on the growth of cassava

| Plant number | Leaf FW (kg plant <sup>-1</sup> ) |      | Leaf FW (kg plant <sup>-1</sup> ) |      | Leaf FW (kg plant <sup>-1</sup> ) |       | Height (m) |      |
|--------------|-----------------------------------|------|-----------------------------------|------|-----------------------------------|-------|------------|------|
|              | Ck                                | A02  | Ck                                | A02  | Ck                                | A02   | Ck         | A02  |
| 1            | 2.82                              | 1.72 | 1.65                              | 1.01 | 0.589                             | 0.487 | 2.71       | 2.35 |
| 2            | 2.48                              | 3.68 | 1.39                              | 1.73 | 0.550                             | 0.674 | 2.49       | 2.70 |
| 3            | 2.70                              | 2.29 | 1.43                              | 1.27 | 0.563                             | 0.584 | 2.55       | 2.51 |
| 4            | 2.51                              | 3.07 | 1.10                              | 1.35 | 0.530                             | 0.629 | 2.32       | 2.70 |
| 5            | 1.81                              | 2.77 | 0.95                              | 1.20 | 0.467                             | 0.622 | 2.20       | 2.68 |
| 6            | 3.42                              | 2.37 | 1.40                              | 1.63 | 0.556                             | 0.619 | 2.55       | 2.55 |
| 7            | 1.37                              | 3.47 | 0.86                              | 1.82 | 0.493                             | 0.763 | 2.06       | 2.94 |
| 8            | 1.76                              | 2.51 | 0.71                              | 1.13 | 0.507                             | 0.622 | 2.10       | 2.50 |
| 9            | 3.08                              | 2.30 | 1.44                              | 0.99 | 0.619                             | 0.529 | 2.40       | 2.35 |
| 10           | 2.16                              | 2.26 | 1.10                              | 1.24 | 0.594                             | 0.568 | 2.30       | 2.48 |
| 11           | 1.88                              | 2.09 | 0.93                              | 0.94 | 0.561                             | 0.601 | 2.10       | 2.40 |
| 12           | 1.95                              | 2.30 | 1.29                              | 1.65 | 0.641                             | 0.658 | 2.40       | 2.55 |
| 13           | 2.18                              | 2.66 | 1.11                              | 1.31 | 0.526                             | 0.686 | 2.25       | 2.60 |
| 14           | 2.21                              | 1.89 | 1.06                              | 0.98 | 0.602                             | 0.620 | 2.40       | 2.40 |
| 15           | 1.97                              | 3.39 | 1.05                              | 1.57 | 0.573                             | 0.823 | 2.20       | 2.81 |
| 16           | 3.29                              | 3.46 | 1.64                              | 2.02 | 0.696                             | 0.800 | 2.60       | 2.88 |
| 17           | 2.42                              | 2.18 | 1.33                              | 1.05 | 0.616                             | 0.647 | 2.50       | 2.45 |
| 18           | 2.63                              | 3.07 | 1.52                              | 1.33 | 0.714                             | 0.678 | 2.70       | 2.60 |
| 19           | 1.59                              | 3.43 | 0.87                              | 1.58 | 0.603                             | 0.655 | 2.20       | 2.65 |
| 20           | 2.44                              | 3.00 | 1.33                              | 1.26 | 0.646                             | 0.670 | 2.30       | 2.62 |
| 21           | 2.03                              | 2.53 | 1.22                              | 1.17 | 0.642                             | 0.655 | 2.40       | 2.59 |
| 22           | 1.72                              | 2.34 | 0.93                              | 1.25 | 0.528                             | 0.645 | 1.86       | 2.62 |
| 23           | 2.16                              | 3.26 | 1.21                              | 1.58 | 0.704                             | 0.728 | 2.60       | 2.75 |
| 24           | 2.88                              | 3.20 | 1.55                              | 1.67 | 0.685                             | 0.688 | 2.62       | 2.67 |
| Average      | 2.31                              | 2.72 | 1.21                              | 1.36 | 0.592                             | 0.652 | 2.37       | 2.60 |
| S.E.         | 0.47                              | 0.55 | 0.25                              | 0.28 | 0.121                             | 0.133 | 0.48       | 0.53 |

\* 22 plants were measured for each treatment, n=22
