# Supplementary material for: Isolation, identification and characterization of nitrogen fixing endophytic bacteria and their effects on cassava production
Source: PeerJ. 2022 Jan 25;10:e12677. doi: 10.7717/peerj.12677 (PMC8796710; doi:10.7717/peerj.12677)
Supplement: Supplemental Information 9 [file peerj-10-12677-s009.xlsx]

## Sheet: Figures
					Figure 1	Nitrogenase activity in nitrogen-free liquid medium.
				Nitrogenase activity (nmol/(mL.h))
				1	2	3	4	Average	S.E.
			A01	1.795	0.584	1.415	1.181	1.24	0.25
			A02	91.929	92.008	100.381	98.913	95.81	2.24
			A03	17.423	14.763	15.144	15.658	15.75	0.59
			A04	7.039	8.157	7.84	11.507	8.64	0.99
			A05	3.641	4.532	3.014	4.152	3.83	0.33
			A06	0.234	0.382	0.301	0.244	0.29	0.03
			A07	2.885	2.73	3.074	2.581	2.82	0.11
			A08	40.58	37.02	35.863	37.632	37.77	1
			A09	2.328	1.872	2.518	1.026	1.94	0.33
			A10	0.269	0.267	0.235	0.185	0.24	0.02
					Figure 2	Nitrogen fixation in nitrogen-free liquid medium
				Nitrogen fixation (mg/L)
				1	2	3	4	Average	S.E.
			A01	0.801	0.851	0.804	0.886	0.835	0.02
			A02	14.88	12.86	13.68	12.13	13.38	0.591
			A03	6.565	6.379	5.488	7.089	6.38	0.333
			A04	6.965	6.315	6.213	6.181	6.419	0.184
			A05	1.534	2.035	2.787	1.363	1.93	0.319
			A06	1.045	1.702	0.301	0.318	0.842	0.335
			A07	0.455	0.419	0.586	0.428	0.472	0.039
			A08	15.79	12.9	10.29	13.6	13.14	1.134
			A09	0.881	0.985	0.855	0.826	0.887	0.035
			A10	0.046	0.012	0.01	0.029	0.024	0.008
					Figure 5	Influence of pH on the nitrogenase activity of strain A02
				Nitrogenase activity (nmol/(mL.h))
			pH	1	2	3	4
			5	5.74	5.76	5.64	5.11
			5	15.22	20.94	18.36	18.94
			6	42.44	45.92	43.95	43.93
			6.5	77.98	78.95	71.87	76.24
			7	79.36	89.91	81.73	73.94
			7.5	60.41	65.98	63.17	63.12
			8	50.05	46.12	52.11	40.91
					Figure 6	Influence of N on the nitrogenase activity of the A02 strain
				Nitrogenase activity (nmol mL-1 h-1)
			N （g/L）	1	2	3	4	Average
			0	26.53	34	30.26	27.37	29.54
			0.2	46.98	39.98	37.49	36.23	40.17
			0.4	60.93	66.99	91.94	93.89	78.44
			0.6	60.84	67.38	39.28	45.93	53.36
			0.8	41.34	33.95	38.49	36.4	37.54
			1	11.94	19.39	9.99	15.39	14.18
					Figure 7	Effect of strain A02 on the growth of cassava
				Leaf FW		Leaf FW		Leaf FW		Height
				(kg plant-1)		(kg plant-1)		(kg plant-1)		(m)
			Plant number	Ck	A02	Ck	A02	Ck	A02	Ck	A02
			1	2.82	1.72	1.65	1.01	0.589	0.487	2.71	2.35
			2	2.48	3.68	1.39	1.73	0.55	0.674	2.49	2.7
			3	2.7	2.29	1.43	1.27	0.563	0.584	2.55	2.51
			4	2.51	3.07	1.1	1.35	0.53	0.629	2.32	2.7
			5	1.81	2.77	0.95	1.2	0.467	0.622	2.2	2.68
			6	3.42	2.37	1.4	1.63	0.556	0.619	2.55	2.55
			7	1.37	3.47	0.86	1.82	0.493	0.763	2.06	2.94
			8	1.76	2.51	0.71	1.13	0.507	0.622	2.1	2.5
			9	3.08	2.3	1.44	0.99	0.619	0.529	2.4	2.35
			10	2.16	2.26	1.1	1.24	0.594	0.568	2.3	2.48
			11	1.88	2.09	0.93	0.94	0.561	0.601	2.1	2.4
			12	1.95	2.3	1.29	1.65	0.641	0.658	2.4	2.55
			13	2.18	2.66	1.11	1.31	0.526	0.686	2.25	2.6
			14	2.21	1.89	1.06	0.98	0.602	0.62	2.4	2.4
			15	1.97	3.39	1.05	1.57	0.573	0.823	2.2	2.81
			16	3.29	3.46	1.64	2.02	0.696	0.8	2.6	2.88
			17	2.42	2.18	1.33	1.05	0.616	0.647	2.5	2.45
			18	2.63	3.07	1.52	1.33	0.714	0.678	2.7	2.6
			19	1.59	3.43	0.87	1.58	0.603	0.655	2.2	2.65
			20	2.44	3	1.33	1.26	0.646	0.67	2.3	2.62
			21	2.03	2.53	1.22	1.17	0.642	0.655	2.4	2.59
			22	1.72	2.34	0.93	1.25	0.528	0.645	1.86	2.62
			23	2.16	3.26	1.21	1.58	0.704	0.728	2.6	2.75
			24	2.88	3.2	1.55	1.67	0.685	0.688	2.62	2.67
			Average	2.31	2.72	1.21	1.36	0.592	0.652	2.37	2.6
			S.E.	0.47	0.55	0.25	0.28	0.121	0.133	0.48	0.53

## Sheet: Tables
				Table 2	Typical characteristics of phosphorus solubilizing ability
				1	2	3	4	Average	S.E.
		P solubilization (mg mL-1)	CK	1.103	0.842	1.355	0.75	1.01	0.14
			A02	102.85	103.01	102.05	97.02	101.2	1.4
		titratable acid	CK	0.015	0.015	0.016	0.007	0.013	0.002
		(mg mL-1)	A02	0.15	0.154	0.156	0.14	0.15	0.004
		pH	CK	6.11	7.19	6.95	6.85
			A02	4.5	4.47	4.48	4.56
		IAA	CK	0	0	0	0	0	0
		(mg mL-1)	A02	1.619	1.506	1.555	1.562	1.56	0.02
				Table 3	Nitrogenase activity and nitrogen content of cassava after inoculation with A02 and no nitrogen application in a field experiment
				Nitrogenase activity (nmol mL-1 h-1)										Nitrogen content (mg g-1)
				1	2	3	4	Average	S.E.					1	2	3	4	Average	S.E.
		Leaf	A02	110.5	117.58	78.28	85.53	97.97	9.5			Leaf	A02	48.7	48.07	45.32	45.94	47.01	0.82
			-N	60.56	54.89	62.93	56.78	58.79	1.81				-N	34.95	37.63	36.35	38.69	36.9	0.81
		Stem	A02	44.69	50.88	47.36	41.76	46.17	1.94			Stem	A02	14.68	14.58	14.59	15.5	13.83	0.32
			-N	40.3	46.47	48.55	52.56	46.97	2.56				-N	14.99	13.32	13.51	13.5	13.83	0.39
		Root	A02	54.16	63.11	56.2	60.02	58.37	1.99			Root	A02	15.76	13.68	11.78	12.71	13.48	0.72
			-N	45.45	46.85	52.77	48.4	48.37	1.59				-N	14.08	12.39	11.59	11.08	12.28	0.6
			Table 4 Nitrogenase activity of some endophytic nitrogen-fixing bacteria in the past five years
				nitrogenase activity	Symbiosis	Author, Year,
			Name	(nmol mL-1 h-1)	plant	Journal
						(Mao et al., 2019)
			Pantoea agglomerans XD20	3187.8	sugarcane	Acta Botanica Boreali-Occidentalia Sinica
			Pantoea sp. NN08200			(Shi et al., 2019),
				2445	sugarcane	Microbiology China
			Stenotrophomonas maltophilia B11S			(Xing et al., 2016)
				1456.23	sugarcane	Sugar Tech
			actinobacterial WZS021			(Wang et al., 2017)
				65	Sugarcane	Sugar Tech
			Sphingomonas trueperi NNA‐14			(Xu et al., 2018)
				350	Giant reed	Journal of Basic Microbiology
			Klebsiella pneumoniae subspecies			(Tan et al., 2017) Chinese Journal of Applied and Environmental Biology
			1′13	103.077	Guangxi wild rice
						(Liu et al., 2017) Journal of Triticeae Crops
			Devosia RKZ210	2.98	highland barley
			K. radicincitans GXGL-4A			(Li et al., 2016) Microbiology China
				232.94	Maize
			Pseudomonas migulae			(Puri et al., 2018)
				2.8	American black pine	Canadian journal of forest research,
						(Liu et al., 2018)
						Antonie Van Leeuwenhoek International journal of general and molecular microbiology,
			Paenibacillus L201	5630	Bryophyllum pinnatum
			Mao L, Huang C, Zhu K, Yang L, Li Y, Xing Y. 2019. Effect of Nitrogen-Fixing Strain XD20on the Growth of Different Sugarcane Varieties. Acta Botanica Boreali-Occidentalia Sinica 39(1):140-148.
			Shi G, Zeng Q, Nong Z, Ye X, Cen Z, Li Y, Hu C. 2019. Identification of an endophytic nitrogen-fixing bacterium NN08200 from sugarcane and its growth promotion of sugarcane. Microbiology China 46(6): 1336-1345. doi: 10.13344/j.microbiol.china.180523.
			Xing Y-X, Wei C-Y, Mo Y, Yang L-T, Huang S-L, Li Y-R. 2016. Nitrogen-Fixing and Plant Growth-Promoting Ability of Two Endophytic Bacterial Strains Isolated from Sugarcane Stalks. Sugar Tech 18(4): 373-379. doi: 10.1007/s12355-015-0397-7.
			Wang Z, Solanki MK, Pang F, Singh RK, Yang L-T, Li Y-R, Li H-B, Zhu K, Xing Y-X 2017. Identification and Efficiency of a Nitrogen-fixing Endophytic Actinobacterial Strain from Sugarcane. Sugar Tech 19(5), 492-500. doi: 10.1007/s12355-016-0498-y.
			Xu J, Kloepper JW, Huang P, McInroy JA, Hu CH. 2018. Isolation and characterization of N-2-fixing bacteria from giant reed and switchgrass for plant growth promotion and nutrient uptake. Journal of Basic Microbiology 58(5):459-471. doi: 10.1002/jobm.201700535.
			Tan Z, Tan Z, Huang H, Zhang X, Liu L, Peng G. 2017. Isolation and phylogenetic analysis of endophytic nitrogen-fixing bacteria from Oryza officinalis in Wuxian. Chinese Journal of Applied and Environmental Biology 23(4):622-627.
			Liu Z, Yue X, Wang B, Xue B, Wang Q. 2017. Diversity of Culturable Endophytic Nitrogen-Fixing Bacteria in Naked Barley Roots from Different Production Regions. Journal of Triticeae Crops 37(4): 565-569.
			Li Q, Cheng J, Sun S, Chen Y. 2016. Isolation, identification and characterization of associative nitrogen-fixing endophytic bacterium Kosakonia radicincitans GXGL-4A in maize. Microbiology China 43(11):2456-2463. doi: 10.13344/j.microbiol.china.151071.
			Puri A, Padda KP, Chanway CP. 2018. Evidence of endophytic diazotrophic bacteria in lodgepole pine and hybrid white spruce trees growing in soils with different nutrient statuses in the West Chilcotin region of British Columbia, Canada. Forest Ecology and Management 430:558-565. doi: 10.1016/j.foreco.2018.08.049.
			Liu L, Yuan T, Yang F, Liu Z, Yang M, Peng G, Tan Z. 2018. Paenibacillus bryophyllum sp. nov., a nitrogen-fixing species isolated from Bryophyllum pinnatum. Antonie Van Leeuwenhoek International Journal of General and Molecular Microbiology 111(12):2267-2273. doi: 10.1007/s10482-018-1117-6.
